# Supplementary material for: The NtrYX Two-Component System of Paracoccus denitrificans Is Required for the Maintenance of Cellular Iron Homeostasis and for a Complete Denitrification under Iron-Limited Conditions
Source: MDPI journal article supplement (doi:10.3390/ijms23169172), 2022-08-15
Supplement: s1 [file s1]

**Table S1.** Differential quantitative proteomic analysis of the wild-type strain *versus* NtrY<sup>-</sup> mutant of *P. denitrificans* PD1222 grown under denitrifying conditions. Location of putative NtrX binding boxes in gene promoter regions encoding affected proteins.

| Protein ID <sup>1</sup> | Locus <sup>2</sup> | Name                                                                         | FC <sup>3</sup> | p-value  | NtrX binding sequence | Start position | End position | Orientation <sup>4</sup> | Distance from start codon <sup>5</sup> |
|-------------------------|--------------------|------------------------------------------------------------------------------|-----------------|----------|-----------------------|----------------|--------------|--------------------------|----------------------------------------|
| A1AZG8                  | Pden_0550          | Lytic transglycosylase, catalytic                                            | WT              | -        | GTGGCGAT<br>CCGCCG    | 523185         | 523198       | C                        | -131                                   |
| A1B1K9                  | Pden_1298          | GDP-mannose 4,6-dehydratase                                                  | WT              | -        | CACCATTT<br>AACCGC    | 1261145        | 1261158      | D                        | -13                                    |
|                         |                    |                                                                              |                 |          | CAGCCGCA<br>AGCGGC    | 1261201        | 1261214      | D                        | -69                                    |
|                         |                    |                                                                              |                 |          | CATGCCGC<br>CCGGGC    | 1261243        | 1261256      | D                        | -111                                   |
|                         |                    |                                                                              |                 |          | CAATGGCG<br>CCGCGC    | 1261268        | 1261281      | D                        | -136                                   |
| A1B2I2                  | Pden_1628          | TonB-dependent receptor, plug                                                | WT              | -        | GAGGGCTT<br>CACGCG    | 1610353        | 1610366      | C                        | -40                                    |
|                         |                    |                                                                              |                 |          | CTGAACCG<br>GGTAGC    | 1610382        | 1610395      | D                        | -69                                    |
| A1B338                  | Pden_1835          | Uncharacterized protein                                                      | WT              | -        | CACCCATC<br>CCTTGC    | 1834875        | 1834888      | D                        | -167                                   |
| A1B520                  | Pden_2527          | Cob(II)yrinic acid a,c-diamide reductase                                     | WT              | -        | CAGCCGTG<br>ACCCGC    | 2539924        | 2539937      | D                        | Pden_2524                              |
| A1B924                  | Pden_3952          | Homocysteine S-methyltransferase                                             | WT              | -        | GTCCGCTC<br>GCGGCG    | 1088315        | 1088328      | C                        | -73                                    |
| A1BBZ8                  | Pden_4982          | Short-chain dehydrogenase/reductase                                          | WT              | -        | Not detected          | -              | -            | -                        | -                                      |
| A1B3P4                  | Pden_2046          | TonB-dependent receptor                                                      | 25.26           | 2.70E-05 | GATCCCTT<br>GTCCCG    | 2053803        | 2053816      | C                        | -105                                   |
|                         |                    |                                                                              |                 |          | CTCGCCCT<br>CTCGGC    | 2053871        | 2053884      | D                        | -37                                    |
| A1B5Q3                  | Pden_2763          | Outer membrane porin                                                         | 23              | 4.40E-04 | CAGGCAAG<br>GATCGC    | 2783522        | 2783535      | D                        | -221                                   |
| A1BA93                  | Pden_4373          | TonB-dependent siderophore receptor                                          | 13.2            | 7.20E-05 | GTATTTAT<br>GGAACG    | 1280822        | 1280835      | C                        | Pden_4372                              |
| A1B9J7                  | Pden_4127          | Two component, sigma54 specific, transcriptional regulator Fis family (NtrX) | 11.8            | 5.92E-05 | Not detected          | -              | -            | -                        | -                                      |
| A1B6E6                  | Pden_3007          | TonB-dependent siderophore receptor                                          | 11.53           | 4.00E-05 | GAATGCTG<br>GCTGCG    | 180571         | 180584       | C                        | -34                                    |
|                         |                    |                                                                              |                 |          | GATTTGCG<br>ATTCCG    | 180584         | 180597       | C                        | -47                                    |
|                         |                    |                                                                              |                 |          | GAAACCGC<br>CGAGCG    | 180610         | 180623       | C                        | -73                                    |
|                         |                    |                                                                              |                 |          | GAGCGACA<br>GCGCCG    | 180619         | 180632       | C                        | -96                                    |
| A1B5A3                  | Pden_2610          | TonB-dependent receptor                                                      | 10.38           | 1.70E-04 | GTCCGGCAG<br>GCTGCG   | 2620681        | 2620694      | C                        | -155                                   |
| A1B859                  | Pden_3636          | OmpW family protein                                                          | 7.76            | 3.40E-04 | GAAAGGAT<br>GATGCG    | 787163         | 787176       | C                        | -108                                   |
| A1B2V1                  | Pden_1748          | MltA-interacting MipA family protein                                         | 4.78            | 2.40E-04 | CAGAACCC<br>GCTTGC    | 1737216        | 1737229      | D                        | -51                                    |
|                         |                    |                                                                              |                 |          | GAAGGGG<br>CGTTTCG    | 1737232        | 1737245      | C                        | -35                                    |
|                         |                    |                                                                              |                 |          | GACGCAGG<br>GTTCCG    | 1737245        | 1737258      | C                        | -22                                    |
| A1B571                  | Pden_2578          | Uncharacterized protein                                                      | 4.52            | 8.90E-04 | Not detected          | -              | -            | -                        | -                                      |
| A1B5L7                  | Pden_2727          | Type I secretion outer membrane protein, TolC family                         | 3.47            | 5.30E-04 | CAAGAACC<br>TCCGGC    | 2745391        | 2745404      | D                        | Pden_2726                              |

|         |           |                                                    |      |          |                    |         |         |   |           |
|---------|-----------|----------------------------------------------------|------|----------|--------------------|---------|---------|---|-----------|
| A1BAA2  | Pden_4382 | TonB-dependent receptor                            | 3.35 | 1.80E-03 | CTTGGCCT<br>TTCCGC | 1575003 | 1575016 | D | -51       |
|         |           |                                                    |      |          | GTAGGCGG<br>TGAGCG | 1574827 | 1574840 | C | -227      |
|         |           |                                                    |      |          | GTGAGCGA<br>AGGCCG | 1574834 | 1574847 | C | -220      |
|         |           |                                                    |      |          | GTCGCCAT<br>CCCGCG | 1574978 | 1574991 | C | -76       |
|         |           |                                                    |      |          | GACGGGCA<br>AGGCCG | 1574796 | 1574809 | C | -258      |
|         |           |                                                    |      |          | GAAGGCCG<br>AAGGCG | 1574840 | 1574853 | C | -214      |
|         |           |                                                    |      |          | GACCTGCC<br>GCAGCG | 1574908 | 1574921 | C | -146      |
| A1B1S5  | Pden_1368 | TonB-dependent receptor                            | 3.35 | 2.30E-03 | CAGAAATG<br>CTCTGC | 1337262 | 1337275 | D | -41       |
|         |           |                                                    |      |          | CTCTGCGG<br>AAAAGC | 1337270 | 1337283 | D | -49       |
|         |           |                                                    |      |          | CTGGCGCA<br>CCCCGC | 1337338 | 1337351 | D | -117      |
|         |           |                                                    |      |          | GAACAGGT<br>CAGGCG | 1337493 | 1337506 | C | -275      |
| Q9R9L0* | Pden_4222 | Pseudoazurin                                       | 2.93 | 3.78E-03 | GAAGGAG<br>AATCGCG | 1385239 | 1385252 | C | -287      |
|         |           |                                                    |      |          | GAGTTTTT<br>TCCTCG | 1385435 | 1385448 | C | -91       |
|         |           |                                                    |      |          | GTTTATGG<br>ATCGCG | 1385278 | 1385291 | C | -248      |
|         |           |                                                    |      |          | GTCCCGAC<br>CCTGCG | 1385398 | 1385411 | C | -128      |
| A1B9V1  | Pden_4231 | Uncharacterized protein                            | 2.88 | 1.60E-03 | Not detected       | -       | -       | - | -         |
| A1B043  | Pden_0775 | 50S ribosomal protein L18                          | 2.88 | 5.80E-04 | GATCGGCT<br>TTAACG | 753186  | 753199  | C | -36       |
| A1B9K1  | Pden_4131 | tRNA-dihydrouridine synthase (NifR3)               | 2.87 | 2.35E-02 | GAAAGAA<br>AACGGCG | 1288467 | 1288480 | C | -32       |
|         |           |                                                    |      |          | GACGGAAT<br>TTGCCG | 1288510 | 1288523 | C | -75       |
|         |           |                                                    |      |          | GAGCTTCA<br>AGTCCG | 1288580 | 1288593 | C | -145      |
|         |           |                                                    |      |          | CTTTCCGC<br>GCCAGC | 1288636 | 1288649 | D | -201      |
| P00096* | Pden_1937 | Cytochrome c550                                    | 2.86 | 2.83E-03 | CACAATGA<br>TCTTGC | 1935525 | 1935538 | D | Pden_1936 |
|         |           |                                                    |      |          | CATGATCC<br>GCAGGC | 1935547 | 1935560 | D |           |
| A1B391  | Pden_1890 | Ribonuclease D                                     | 2.79 | 1.40E-04 | CTTGTAAC<br>AGCAGC | 1893373 | 1893386 | D | Pden_1892 |
| A1B946  | Pden_3974 | Cytochrome c-type biogenesis protein (CcmE)        | 2.61 | 2.60E-03 | CTGCCGCA<br>AGCCGC | 1112756 | 1112769 | D | Pden_3973 |
| A1B698  | Pden_2958 | Transcriptional regulator, BadM/Rrf2 family (IscR) | 2.59 | 7.30E-04 | CTTGCCTA<br>TGTCGC | 127693  | 127706  | D | -64       |
|         |           |                                                    |      |          | GATCTAGA<br>GCCGCG | 127726  | 127739  | C | -97       |
| Q2HPX3* | Pden_2487 | Nitrite reductase NirS (cytochrome cd1)            | 2.53 | 1.00E-02 | GTCAAAGC<br>CCCXCG | 2503931 | 2503944 | C | -54       |
|         |           |                                                    |      |          | GAACGGCG<br>TGAACG | 2503961 | 2503974 | C | -24       |
| A1B0G0* | Pden_0893 | Cytochrome c peroxidase                            | 2.31 | 2.00E-02 | GTGGGCGC<br>GTCTCG | 877144  | 877157  | C | -78       |
|         |           |                                                    |      |          | GTCAGATG<br>TTTTCG | 877199  | 877212  | C | -133      |
|         |           |                                                    |      |          | GTTCTGCC<br>TTGCCG | 877215  | 877228  | C | -149      |
|         |           |                                                    |      |          | GACGGTCC<br>GTCGCG | 877174  | 877187  | C | -108      |
| A1B4F2* | Pden_2305 | Ubiquinol-cytochrome c                             | 2.10 | 3.62E-03 | CTGCGGCG<br>ATTTCG | 2303754 | 2303767 | D | -119      |

|        |           |                                                              |      |          |                            |         |         |   |           |
|--------|-----------|--------------------------------------------------------------|------|----------|----------------------------|---------|---------|---|-----------|
|        |           | reductase iron-sulfur subunit                                |      |          |                            |         |         |   |           |
|        |           |                                                              |      |          | <b>GTTCCGTC<br/>GTATCG</b> | 2303853 | 2303866 | C | -20       |
|        |           |                                                              |      |          | <b>GTCGTATC<br/>GCCCCG</b> | 2303858 | 2303871 | C | -15       |
|        |           |                                                              |      |          | <b>GATCGCTA<br/>GAACCG</b> | 2303809 | 2303822 | C | -64       |
| A1BAG8 | Pden_4448 | ABC transporter related protein                              | 2.09 | 6.30E-04 | <b>CTAAACTA<br/>ATTAGC</b> | 1656656 | 1656669 | D | -44       |
| A1B3Z2 | Pden_2144 | Thymidylate kinase                                           | 0.46 | 2.00E-03 | <b>CAGCGTTC<br/>ACTTGC</b> | 2143646 | 2143659 | D | Pden_2143 |
| A1B9D6 | Pden_4064 | Uncharacterized protein                                      | 0.45 | 1.80E-03 | <b>CTGCCTTC<br/>ATGCGC</b> | 1218576 | 1218589 | D | -53       |
|        |           |                                                              |      |          | <b>CTTCATGC<br/>GCCCCG</b> | 1218580 | 1218593 | D | -49       |
|        |           |                                                              |      |          | <b>CTGCAAAA<br/>CTCCGC</b> | 1218627 | 1218640 | D | -2        |
| A1B8Z2 | Pden_3920 | Pyridoxal-5'-phosphate-dependent enzyme, beta subunit        | 0.44 | 2.10E-03 | <b>CTTGTTGA<br/>CCAAGC</b> | 1057157 | 1057170 | D | Pden_3921 |
| A1B589 | Pden_2596 | Mutator MutT protein                                         | 0.44 | 5.70E-04 | Not detected               | -       | -       | - | -         |
| A1B1R3 | Pden_1355 | Methionine synthase (B12-independent)                        | 0.43 | 1.00E-03 | <b>CATGCCAC<br/>TGGCGC</b> | 1319848 | 1319861 | D | -201      |
|        |           |                                                              |      |          | <b>CAAGGTGA<br/>CATCGC</b> | 1319972 | 1319985 | D | -77       |
|        |           |                                                              |      |          | <b>CATCGCCG<br/>CTTCGC</b> | 1319980 | 1319993 | D | -69       |
|        |           |                                                              |      |          | <b>CTGTTTCC<br/>TCAGGC</b> | 1320030 | 1320043 | D | -19       |
|        |           |                                                              |      |          | <b>CTCAGAAG<br/>GCATGC</b> | 1320046 | 1320059 | D | -3        |
|        |           |                                                              |      |          | <b>GTTTCCTC<br/>AGGCCG</b> | 1320032 | 1320045 | C | -17       |
|        |           |                                                              |      |          | <b>GACCGCGG<br/>TGGGCG</b> | 1319938 | 1319951 | C | -111      |
|        |           |                                                              |      |          | <b>GAGCGGCC<br/>CATCCG</b> | 1319958 | 1319971 | C | -91       |
|        |           |                                                              |      |          | <b>GATATGCA<br/>AGGACG</b> | 1321054 | 1321067 | C | -7        |
| A1B3E3 | Pden_1944 | Peptidyl-dipeptidase Dcp, Metallo peptidase                  | 0.41 | 2.00E-03 | <b>CTTTTCCG<br/>GTTGGC</b> | 1947257 | 1947270 | D | -9        |
| A1B3N2 | Pden_2034 | Toluene tolerance family protein                             | 0.38 | 1.90E-03 | Not detected               | -       | -       | - | -         |
| A1BAD2 | Pden_4412 | Acyl-CoA dehydrogenase domain protein                        | 0.38 | 2.10E-03 | <b>CTTTCAAA<br/>CCGGGC</b> | 1613831 | 1613844 | D | -31       |
| A1B502 | Pden_2509 | RNA pyrophosphohydrolase                                     | 0.38 | 1.20E-03 | Not detected               | -       | -       | - | -         |
| A1B0J8 | Pden_0931 | Extracellular solute-binding protein, family 5               | 0.36 | 1.70E-03 | <b>CAGATTAA<br/>CCGCGC</b> | 912848  | 912861  | D | -100      |
|        |           |                                                              |      |          | <b>CATTGCGG<br/>CCATGC</b> | 913038  | 913051  | D | -291      |
|        |           |                                                              |      |          | <b>CTCATGAC<br/>TAGCGC</b> | 912958  | 912971  | D | -210      |
| A1B8X3 | Pden_3901 | ATPase associated with various cellular activities, AAA_3    | 0.34 | 2.80E-04 | Not detected               | -       | -       | - | -         |
| A1AZE1 | Pden_0523 | tRNA 2-selenouridine synthase                                | 0.28 | 2.40E-05 | <b>GTTGATCC<br/>CGGGCG</b> | 493347  | 493360  | C | Pden_0522 |
| A1B4M0 | Pden_2374 | Two component transcriptional regulator, winged helix family | 0.28 | 6.40E-05 | <b>CAGCGGTT<br/>TGCAGC</b> | 2373062 | 2373075 | D | -54       |

|        |           |                                                                 |      |          |                            |         |         |   |           |
|--------|-----------|-----------------------------------------------------------------|------|----------|----------------------------|---------|---------|---|-----------|
|        |           |                                                                 |      |          | <b>CTGTGGCG<br/>CGGCGC</b> | 2373038 | 2373051 | D | -30       |
| A1B430 | Pden_2182 | Uncharacterized protein                                         | 0.27 | 1.30E-03 | Not detected               | -       | -       | - | -         |
| A1AZ44 | Pden_0424 | Tetratricopeptide TPR_2 repeat protein                          | 0.27 | 2.70E-03 | <b>GATGGCCG<br/>GGGGCG</b> | 398160  | 398173  | C | Pden_0425 |
| A1B249 | Pden_1493 | ABC transporter related protein                                 | 0.27 | 8.50E-04 | <b>CAGTAGCG<br/>GTACGC</b> | 1457042 | 1457055 | D | -40       |
|        |           |                                                                 |      |          | <b>GAGTGAAT<br/>GAGTCG</b> | 1457020 | 1457033 | C | -18       |
| A1B1W4 | Pden_1407 | Uncharacterized protein                                         | 0.25 | 1.30E-04 | <b>CTTTACCC<br/>CGACGC</b> | 1376453 | 1376466 | D | -1        |
| A1AZV2 | Pden_0684 | Cell division and transport-associated protein (TolR)           | 0.25 | 5.70E-04 | <b>CTGGGCGG<br/>TTCTGC</b> | 664787  | 664800  | D | Pden_0683 |
| A1B5G2 | Pden_2669 | Outer-membrane lipoprotein carrier protein                      | 0.24 | 1.30E-03 | <b>CACATCAC<br/>GTTCGC</b> | 2680111 | 2680124 | D | -32       |
|        |           |                                                                 |      |          | <b>CTCCAAAG<br/>ACATGC</b> | 2680098 | 2680111 | D | -19       |
|        |           |                                                                 |      |          | <b>GTTCGCTG<br/>GATGCG</b> | 2680119 | 2680132 | C | -40       |
| A1B310 | Pden_1807 | Extracellular solute-binding protein, family 5                  | 0.2  | 2.90E-04 | <b>CATCCTTG<br/>CGCGGC</b> | 1802101 | 1802114 | D | -157      |
| A1B678 | Pden_2938 | Efflux transporter, RND family, MFP subunit                     | 0.2  | 3.00E-04 | <b>CTTGCGGT<br/>CCCGGC</b> | 103918  | 103931  | D | -191      |
|        |           |                                                                 |      |          | <b>GTCCTGAT<br/>GGGACG</b> | 103836  | 103849  | C | -109      |
|        |           |                                                                 |      |          | <b>GTCTTGCG<br/>GTCCCG</b> | 103916  | 103929  | C | -189      |
| A1B1T9 | Pden_1382 | Protease Do                                                     | 0.19 | 2.90E-03 | <b>CATGCCGG<br/>GGCGGC</b> | 1351508 | 1351521 | D | -16       |
|        |           |                                                                 |      |          | <b>CAAATGAA<br/>CCACGC</b> | 1351577 | 1351590 | D | -85       |
| A1B5K4 | Pden_2714 | Peptidase M16 domain protein                                    | 0.17 | 2.20E-03 | <b>GTGATCGG<br/>CGCGCG</b> | 2732614 | 2732627 | C | Pden_2715 |
| A1AZX3 | Pden_0705 | Lytic transglycosylase, catalytic                               | 0.17 | 1.00E-04 | Not detected               | -       | -       | - | -         |
| A1BBB0 | Pden_4743 | Peptidoglycan-binding domain 1 protein                          | 0.16 | 3.10E-03 | <b>CACGTTCG<br/>CATCGC</b> | 227995  | 228008  | D | -162      |
|        |           |                                                                 |      |          | <b>CACGCGCT<br/>CCTCGC</b> | 228153  | 228166  | D | -4        |
|        |           |                                                                 |      |          | <b>GTCGGCCC<br/>CGGCCG</b> | 228114  | 228127  | C | -43       |
| A1AZV1 | Pden_0683 | Cell division and transport-associated protein (TolQ)           | 0.15 | 3.50E-04 | <b>CTGGGCGG<br/>TTCTGC</b> | 664787  | 664800  | D | -56       |
| A1B003 | Pden_0735 | Carboxymethylen ebutenolidase                                   | 0.14 | 3.10E-03 | <b>CAGCAGGG<br/>CGGGGC</b> | 719259  | 719272  | D | -27       |
| A1B5K5 | Pden_2715 | Peptidase M16 domain protein                                    | 0.11 | 3.00E-04 | <b>GTGATCGG<br/>CGCGCG</b> | 2732614 | 2732627 | C | -80       |
| A1AY36 | Pden_0063 | Protein-methionine-sulfoxide reductase catalytic subunit (MsrP) | 0.09 | 1.70E-03 | <b>CATCGGCA<br/>TCCGGC</b> | 56371   | 56384   | D | -43       |
|        |           |                                                                 |      |          | <b>GAAGCGA<br/>AGGGGCG</b> | 56298   | 56311   | C | -116      |
| A1AYH7 | Pden_0207 | Alpha/beta hydrolase fold protein                               | NtrY | -        | <b>CAGAGGCG<br/>AAACGC</b> | 191151  | 191164  | D | -26       |
|        |           |                                                                 |      |          | <b>GAAGGGC<br/>AGAGGCG</b> | 191145  | 191158  | C | -20       |
| A1AZW8 | Pden_0700 | Multisubunit potassium/proton antiporter, (PhaE)                | NtrY | -        | <b>CATCGCCT<br/>AGTTGC</b> | 677798  | 677811  | D | Pden_0697 |

|        |           |                                                                     |      |   |                    |         |         |   |           |
|--------|-----------|---------------------------------------------------------------------|------|---|--------------------|---------|---------|---|-----------|
| A1AZZ6 | Pden_0728 | FAD-binding 9, siderophore-interacting domain protein               | NtrY | - | CAAGGTCA<br>ACGGGC | 712033  | 712046  | D | -47       |
| A1B127 | Pden_1113 | Amidase, hydantoinase/carb amoylase family                          | NtrY | - | CACGCGGA<br>AGCCGC | 1090914 | 1090927 | D | -27       |
|        |           |                                                                     |      |   | CTTGTCGG<br>GCACGC | 1090905 | 1090918 | D | -18       |
|        |           |                                                                     |      |   | CTCCTCCT<br>TCCCGC | 1091052 | 1091065 | D | -19       |
|        |           |                                                                     |      |   | CTCCTTCC<br>CGCCGC | 1091055 | 1091068 | D | -168      |
|        |           |                                                                     |      |   | GACCGCAA<br>CTCCCG | 1091022 | 1091035 | C | -136      |
|        |           |                                                                     |      |   | GACCGGCA<br>GATCCG | 1091124 | 1091137 | C | -237      |
| A1B2K1 | Pden_1648 | Transcriptional regulator, GntR family                              | NtrY | - | Not detected       | -       | -       | - | -         |
|        |           |                                                                     |      |   | Not detected       | -       | -       | - | -         |
| A1B2R8 | Pden_1715 | Amino acid/amide ABC transporter ATP-binding protein 2, HAAT family | NtrY | - | GTTACCGT<br>CAGGCG | 1704106 | 1704119 | C | Pden_1717 |
| A1B3I4 | Pden_1986 | Cardiolipin synthetase 2                                            | NtrY | - | CAATTCGG<br>CACCGC | 1990646 | 1990659 | D | -56       |
|        |           |                                                                     |      |   | CTGCGTGG<br>AATTGC | 1990633 | 1990646 | D | -43       |
| A1B3W6 | Pden_2118 | Uncharacterized protein                                             | NtrY | - | Not detected       | -       | -       | - | -         |
| A1B4I6 | Pden_2168 | Putative arginyl-tRNA-protein transferase                           | NtrY | - | CAGCCGAA<br>ACGCGC | 2173379 | 2173392 | D | -83       |
|        |           |                                                                     |      |   | CTCAGCCC<br>CAGAGC | 2173345 | 2173358 | D | -103      |
|        |           |                                                                     |      |   | GTCAATGC<br>CGCGCG | 2173266 | 2173279 | C | -183      |
|        |           |                                                                     |      |   | GATGGACC<br>GGAACG | 2173280 | 2173293 | C | -168      |
|        |           |                                                                     |      |   | GAATGACC<br>CGACCG | 2173401 | 2173414 | C | -47       |
| A1B4V2 | Pden_2459 | OmpA/MotB domain protein                                            | NtrY | - | Not detected       | -       | -       | - | -         |
| A1B5F5 | Pden_2662 | Conserved hypothetical integral membrane protein                    | NtrY | - | Not detected       | -       | -       | - | -         |
| A1B621 | Pden_2881 | Transcriptional regulator, ArsR family                              | NtrY | - | GTTATCGG<br>TTGGCG | 45372   | 45385   | C | -159      |
|        |           |                                                                     |      |   | GTGATAGG<br>GACTCG | 45388   | 45401   | C | -143      |
|        |           |                                                                     |      |   | GTTAAGCA<br>AAGCCG | 45531   | 45544   | C | -1        |
|        |           |                                                                     |      |   | GATAGGGA<br>CTCGCG | 45390   | 45403   | C | -141      |
| A1B667 | Pden_2927 | L-lactate transport                                                 | NtrY | - | GTTCCGCC<br>GTTGCG | 90553   | 90566   | C | -25       |
|        |           |                                                                     |      |   | GTCCTGCG<br>CGGTCC | 90575   | 90588   | C | -47       |
| A1B672 | Pden_2932 | Gluconokinase                                                       | NtrY | - | Not detected       | -       | -       | - | -         |
| A1B6D1 | Pden_2992 | Uncharacterized protein                                             | NtrY | - | CTCCTGTT<br>TCCCGC | 166493  | 166506  | D | -8        |
|        |           |                                                                     |      |   | GTATGGAA<br>CAACCG | 166575  | 166588  | C | -90       |
|        |           |                                                                     |      |   | GAACAACC<br>GCCGCG | 166580  | 166593  | C | -95       |
| A1B7U3 | Pden_3517 | Urocanate hydratase                                                 | NtrY | - | Not detected       | -       | -       | - | -         |
| A1B839 | Pden_3616 | Uncharacterized protein                                             | NtrY | - | Not detected       | -       | -       | - | -         |

|        |           |                                                                      |      |   |                            |         |         |   |           |
|--------|-----------|----------------------------------------------------------------------|------|---|----------------------------|---------|---------|---|-----------|
| A1B905 | Pden_3933 | Transcriptional regulator, AraC family with amidase-like domain      | NtrY | - | <b>CTGGAATC<br/>CGCGGC</b> | 1070748 | 1070761 | D | -13       |
|        |           |                                                                      |      |   | <b>CTTTTCCT<br/>TTGGGC</b> | 1070793 | 1070806 | D | -58       |
|        |           |                                                                      |      |   | <b>GTCTGGAA<br/>TCCGCG</b> | 1070746 | 1070759 | C | -11       |
| A1B988 | Pden_4016 | Uncharacterized protein                                              | NtrY | - | <b>CTGAACCC<br/>GACGGC</b> | 1163975 | 1163988 | D | Pden_4017 |
| A1B9A8 | Pden_4036 | Cell elongation-specific peptidoglycan biosynthesis regulator (RodA) | NtrY | - | Not detected               | -       | -       | - | -         |
| A1B9M4 | Pden_4154 | Sulfate thiol esterase (SoxB)                                        | NtrY | - | <b>CTGCGGCC<br/>GCCGGC</b> | 1309602 | 1309615 | D | -100      |
|        |           |                                                                      |      |   | <b>CTTGCCCG<br/>AAACGC</b> | 1309684 | 1309697 | D | -18       |
|        |           |                                                                      |      |   | <b>GACCCCAA<br/>CCTTCG</b> | 1309630 | 1309643 | C | -72       |
|        |           |                                                                      |      |   | <b>GACGCGCC<br/>TTGGCG</b> | 1309658 | 1309671 | C | -44       |
| A1BA39 | Pden_4319 | Uncharacterized protein                                              | NtrY | - | <b>CTGAGGCC<br/>GCCGGC</b> | 1500280 | 1500293 | D | Pden_4321 |
| A1BA63 | Pden_4343 | Sulfate ABC transporter, inner membrane subunit (CysT)               | NtrY | - | <b>GACAGAGT<br/>TTATCG</b> | 1528009 | 1528022 | C | Pden_4344 |
| A1BA76 | Pden_4356 | Cytochrome B561                                                      | NtrY | - | Not detected               | -       | -       | - | -         |
| A1BA91 | Pden_4371 | Uncharacterized protein                                              | NtrY | - | <b>GAGCCTCC<br/>CTGTCC</b> | 1562578 | 1562591 | C | -41       |
| A1BAB0 | Pden_4390 | Carbohydrate ABC transporter membrane protein 1, CUT1 family         | NtrY | - | <b>GTTCGCGC<br/>CTGTCC</b> | 1588987 | 1589000 | C | Pden_4393 |
| A1BAS3 | Pden_4554 | Uncharacterized protein                                              | NtrY | - | <b>CTGCGGGG<br/>CGCGGC</b> | 35592   | 35605   | D | Pden_4553 |
| A1BAU4 | Pden_4575 | Transcriptional regulator, LysR family                               | NtrY | - | Not detected               | -       | -       | - | -         |
| A1BBC5 | Pden_4758 | Branched-chain alpha-keto acid dehydrogenase E1 component            | NtrY | - | <b>GAGATTTT<br/>GCGGCG</b> | 252159  | 252172  | C | -         |
| A1BBL6 | Pden_4850 | Monosaccharide ABC transporter ATP-binding protein, CUT2 family      | NtrY | - | <b>GACGCCCT<br/>GCGGCG</b> | 351591  | 351604  | C | -39       |
| A1BBY2 | Pden_4966 | Uncharacterized protein                                              | NtrY | - | <b>CAGGCGGC<br/>ATCTGC</b> | 474009  | 474022  | D | Pden_4965 |
| A1BC46 | Pden_5030 | Uncharacterized protein                                              | NtrY | - | <b>CAATGGAA<br/>GCAGGC</b> | 542789  | 542802  | D | -36       |
|        |           |                                                                      |      |   | <b>CATCCTTC<br/>GCCGGC</b> | 542898  | 542911  | D | -145      |
|        |           |                                                                      |      |   | <b>CTCCAAGG<br/>GAGCGC</b> | 542819  | 542832  | D | -66       |
|        |           |                                                                      |      |   | <b>GACCGGCA<br/>CCAGCG</b> | 543030  | 543043  | C | -277      |
| A1BC98 | Pden_5082 | L-glutamate ABC transporter ATP-binding protein                      | NtrY | - | <b>GTGTCCCG<br/>GCCGCG</b> | 595041  | 595054  | C | -22       |
| A1BCB2 | Pden_5096 | Amino acid/amide ABC transporter membrane protein 1, HAAT family     | NtrY | - | <b>GACCGGGC<br/>CCGACG</b> | 608824  | 608837  | C | -40       |
| A1AYW5 | Pden_0345 | Uncharacterized protein                                              | NtrY | - | <b>CTCTCTCG<br/>TTACGC</b> | 328044  | 328057  | D | -194      |
|        |           |                                                                      |      |   | <b>GATTGCTG<br/>AATTCG</b> | 327993  | 328006  | C | -245      |

|        |           |                                                                      |      |   |                                  |         |         |   |           |
|--------|-----------|----------------------------------------------------------------------|------|---|----------------------------------|---------|---------|---|-----------|
| A1B4K3 | Pden_2357 | ABC transporter related protein                                      | NtrY | - | Not detected                     | -       | -       | - | -         |
| A1AYG6 | Pden_0194 | Uncharacterized protein                                              | NtrY | - | <b>GATGGCCG</b><br><b>ATCTCG</b> | 176639  | 176652  | C | -29       |
|        |           |                                                                      |      |   | <b>CAGGTGTT</b><br><b>TATGGC</b> | 176789  | 176802  | D | -164      |
|        |           |                                                                      |      |   | <b>CTGCTTGG</b><br><b>TCCCGC</b> | 176734  | 176747  | D | -109      |
|        |           |                                                                      |      |   | <b>GTCCCGCC</b><br><b>GGTTCC</b> | 176741  | 176754  | C | -116      |
| A1AYP9 | Pden_0279 | Transcriptional regulator, GntR family                               | NtrY | - | <b>CAGGCCGT</b><br><b>TTTGGC</b> | 257567  | 257580  | D | -125      |
|        |           |                                                                      |      |   | <b>CATAGCAT</b><br><b>TATGGC</b> | 257661  | 257674  | D | -30       |
|        |           |                                                                      |      |   | <b>CTCGTCGG</b><br><b>CTTGGC</b> | 257587  | 257600  | D | -104      |
| A1AZ69 | Pden_0449 | Exonuclease, RNase T and DNA polymerase III                          | NtrY | - | Not detected                     | -       | -       | - | -         |
| A1AZD2 | Pden_0514 | Sarcosine oxidase, delta subunit, heterotetrameric                   | NtrY | - | <b>CATCCGGG</b><br><b>CCCCGC</b> | 484077  | 484090  | D | -205      |
|        |           |                                                                      |      |   | <b>CAAGCCGC</b><br><b>CCCCGC</b> | 484128  | 484141  | D | -154      |
|        |           |                                                                      |      |   | <b>CAGCGGCC</b><br><b>TTGCGC</b> | 484157  | 484170  | D | -125      |
|        |           |                                                                      |      |   | <b>CATCGACC</b><br><b>TTCTGC</b> | 484220  | 484233  | D | -62       |
| A1AZL8 | Pden_0600 | Putative glutamine amidotransferase                                  | NtrY | - | <b>CTTTTCGT</b><br><b>GCTAGC</b> | 576716  | 576729  | D | -16       |
| A1AZM7 | Pden_0609 | ABC transporter related protein                                      | NtrY | - | <b>CTGAATGC</b><br><b>CGCAGC</b> | 584692  | 584705  | D | -32       |
|        |           |                                                                      |      |   | <b>GAACAA</b><br><b>GTTTCCG</b>  | 584639  | 584652  | C | -71       |
| A1B068 | Pden_0800 | ABC transporter related protein                                      | NtrY | - | Not detected                     | -       | -       | - | -         |
| A1B098 | Pden_0830 | Binding-protein-dependent transport systems inner membrane component | NtrY | - | <b>CTAGTCTC</b><br><b>GCGCGC</b> | 909565  | 909578  | D | Pden_0829 |
| A1B0B5 | Pden_0847 | Polysaccharide biosynthesis protein                                  | NtrY | - | Not detected                     | -       | -       | - | -         |
| A1B0I8 | Pden_0921 | NAD kinase                                                           | NtrY | - | <b>CTGGCCAT</b><br><b>GATGGC</b> | 902907  | 902920  | D | -3        |
|        |           |                                                                      |      |   | <b>GACTGCGC</b><br><b>GCGGCG</b> | 903708  | 903721  | C | -18       |
| A1B0T8 | Pden_1021 | Spermidine/putrescine ABC transporter                                | NtrY | - | <b>CACGATCT</b><br><b>CCTAGC</b> | 1000137 | 1000150 | D | -76       |
|        |           |                                                                      |      |   | <b>GATTGGAA</b><br><b>GATCCG</b> | 1000108 | 1000121 | C | -106      |
| A1B137 | Pden_1123 | Transcriptional regulator, Fis family                                | NtrY | - | Not detected                     | -       | -       | - | -         |
| A1B159 | Pden_1145 | Intracellular protease, PfpI family                                  | NtrY | - | <b>CAAAAGG</b><br><b>GCAGGGC</b> | 1122202 | 1122215 | D | -40       |
|        |           |                                                                      |      |   | <b>GACGGACC</b><br><b>TGTCCG</b> | 1122178 | 1122191 | C | -16       |
| A1B1B7 | Pden_1206 | Urease accessory protein (UreF)                                      | NtrY | - | Not detected                     | -       | -       | - | -         |
| A1B1D8 | Pden_1227 | Uncharacterized protein                                              | NtrY | - | Not detected                     | -       | -       | - | -         |
|        |           |                                                                      |      |   | Not detected                     | -       | -       | - | -         |
| A1B1G0 | Pden_1249 | Binding-protein-dependent transport systems                          | NtrY | - | Not detected                     | -       | -       | - | -         |

|        |           |                                                  |      |   |                             |         |         |   |           |
|--------|-----------|--------------------------------------------------|------|---|-----------------------------|---------|---------|---|-----------|
|        |           | inner membrane component                         |      |   |                             |         |         |   |           |
| A1B1I5 | Pden_1274 | Uncharacterized protein                          | NtrY | - | <b>CTGGGCGC<br/>TGTCGC</b>  | 1233932 | 1233945 | D | -105      |
|        |           |                                                  |      |   | <b>CTGGAGAG<br/>CGCGGC</b>  | 1233985 | 1233998 | D | -158      |
|        |           |                                                  |      |   | <b>GAGAGCGC<br/>GGCCCG</b>  | 1233988 | 1234001 | C | -161      |
| A1B1K0 | Pden_1289 | Multisubunit potassium/proton antiporter, (PhaB) | NtrY | - | <b>CAATATTT<br/>TATCGC</b>  | 1251847 | 1251860 | D | -104      |
|        |           |                                                  |      |   | <b>GTTGCGGG<br/>TGTGCG</b>  | 1251758 | 1251771 | C | -15       |
|        |           |                                                  |      |   | <b>GACGCAAA<br/>AATCCG</b>  | 1251825 | 1251838 | C | -82       |
| A1B1L1 | Pden_1300 | Uncharacterized protein                          | NtrY | - | <b>CAGCGGGG<br/>CAACGC</b>  | 1262736 | 1262749 | D | -70       |
|        |           |                                                  |      |   | <b>CATTCTTT<br/>GCAAGC</b>  | 1262750 | 1262763 | D | -56       |
| A1B2F0 | Pden_1594 | Polyphosphate kinase                             | NtrY | - | <b>CTTTGCCC<br/>TCTCGC</b>  | 1574474 | 1574487 | D | -13       |
| A1B2Y8 | Pden_1785 | Helix-turn-helix domain protein                  | NtrY | - | <b>CTGCGCGT<br/>CCCGGC</b>  | 1776578 | 1776591 | D | Pden_1783 |
| A1B3X7 | Pden_2129 | Uncharacterized protein                          | NtrY | - | <b>GACGGGG<br/>GCGGCCG</b>  | 2129834 | 2129847 | C | Pden_2128 |
| A1B4G4 | Pden_2317 | Uncharacterized protein                          | NtrY | - | <b>CATCCAGC<br/>GATTGC</b>  | 2316365 | 2316378 | D | -32       |
|        |           |                                                  |      |   | <b>CAAATCCG<br/>GCCCGC</b>  | 2316389 | 2316402 | D | -56       |
|        |           |                                                  |      |   | <b>CTTGAACA<br/>TGCTGC</b>  | 2316587 | 2316600 | D | -254      |
|        |           |                                                  |      |   | <b>CTGGTCCA<br/>GCATGC</b>  | 2316608 | 2316621 | D | -275      |
|        |           |                                                  |      |   | <b>GTTTGTC<br/>AATCCG</b>   | 2316383 | 2316396 | C | -50       |
|        |           |                                                  |      |   | <b>GTCAAATC<br/>CGGCCG</b>  | 2316387 | 2316400 | C | -54       |
|        |           |                                                  |      |   | <b>GTTGGGGC<br/>GTTCCG</b>  | 2316535 | 2316548 | C | -202      |
|        |           |                                                  |      |   | <b>GTTCCGTT<br/>ATGCCG</b>  | 2316543 | 2316556 | C | -210      |
|        |           |                                                  |      |   | <b>GTCCAGCA<br/>TGCGCG</b>  | 2316611 | 2316624 | C | -278      |
|        |           |                                                  |      |   | <b>GACTAAAA<br/>TACGCG</b>  | 2316511 | 2316524 | C | -178      |
|        |           |                                                  |      |   | <b>GATGAAGA<br/>ATACCG</b>  | 2316630 | 2316643 | C | -297      |
| A1B4G7 | Pden_2320 | Uncharacterized protein                          | NtrY | - | Not detected                | -       | -       | - | -         |
| A1B4K8 | Pden_2362 | Coenzyme PQQ synthesis protein B                 | NtrY | - | <b>CACCGCAT<br/>GAATGC</b>  | 2358351 | 2358364 | D | -178      |
|        |           |                                                  |      |   | <b>CACGGGTC<br/>GCGGGC</b>  | 2358424 | 2358437 | D | -251      |
|        |           |                                                  |      |   | <b>CTCAAGGT<br/>CACCGC</b>  | 2358343 | 2358356 | D | -170      |
|        |           |                                                  |      |   | <b>GAATATCG<br/>CCGGCG</b>  | 2358223 | 2358236 | C | -50       |
|        |           |                                                  |      |   | <b>GATTTCCT<br/>TCGGCG</b>  | 2358299 | 2358312 | C | -126      |
|        |           |                                                  |      |   | <b>GATGGCAC<br/>GGGTCTG</b> | 2358419 | 2358432 | C | -246      |
| A1B4Q2 | Pden_2408 | Uncharacterized protein                          | NtrY | - | Not detected                | -       | -       | - | -         |
| A1B4T8 | Pden_2445 | Uncharacterized protein                          | NtrY | - | <b>CTTTGCCC<br/>GGGGGC</b>  | 2450878 | 2450891 | D | -126      |
|        |           |                                                  |      |   | <b>CTGCGGCA<br/>CCGGGC</b>  | 2450903 | 2450916 | D | -101      |
|        |           |                                                  |      |   | <b>CTTGCCGA<br/>ACAGGC</b>  | 2450986 | 2450999 | D | -18       |
| A1B4U2 | Pden_2449 | FHA domain containing protein                    | NtrY | - | Not detected                | -       | -       | - | -         |
| A1B575 | Pden_2582 | Uncharacterized protein                          | NtrY | - | <b>CACGGCTA<br/>ATAGGC</b>  | 2594642 | 2594655 | D | -118      |



|        |           |                                                    |      |   |                    |         |         |   |           |
|--------|-----------|----------------------------------------------------|------|---|--------------------|---------|---------|---|-----------|
| A1B5F1 | Pden_2658 | Major facilitator superfamily MFS_1                | NtrY | - | CACAGCTT<br>GGCCGC | 2668470 | 2668483 | D | Pden_2657 |
| A1B5M3 | Pden_2733 | Uncharacterized protein                            | NtrY | - | Not detected       | -       | -       | - | -         |
| A1B5M4 | Pden_2734 | Uncharacterized protein                            | NtrY | - | Not detected       | -       | -       | - | -         |
| A1B5X2 | Pden_2832 | Rieske (2Fe-2S) domain protein                     | NtrY | - | CAGCCGAA<br>TGTCGC | 2851921 | 2851934 | D | -176      |
|        |           |                                                    |      |   | CTGCCGTA<br>ACTTGC | 2851799 | 2851812 | D | -54       |
|        |           |                                                    |      |   | CTCCGTCC<br>GGTCGC | 2852031 | 2852044 | D | -286      |
| A1B6G6 | Pden_3027 | Alkyl hydroperoxide reductase (AhpD)               | NtrY | - | GACGCTTG<br>CCGCCG | 201716  | 201729  | C | Pden_3026 |
| A1B6R9 | Pden_3132 | Rhodanese domain protein                           | NtrY | - | GTCGGAAT<br>GGAACG | 316380  | 316393  | C | -25       |
|        |           |                                                    |      |   | GAACGCGA<br>ACTTCG | 316389  | 316402  | C | -34       |
| A1B6X4 | Pden_3187 | Uncharacterized protein                            | NtrY | - | GACCGCGC<br>CCACCG | 352722  | 352735  | C | -172      |
|        |           |                                                    |      |   | GTCGGTCG<br>GCGACG | 352812  | 352825  | C | -82       |
| A1B712 | Pden_3225 | 3-hydroxyacyl-CoA dehydrogenase                    | NtrY | - | GTTCGAGG<br>CAACCG | 394680  | 394693  | C | Pden_3228 |
| A1B713 | Pden_3226 | Acetyl-CoA acetyltransferase                       | NtrY | - | GTTCGAGG<br>CAACCG | 394680  | 394693  | C | Pden_3228 |
| A1B751 | Pden_3267 | Amidohydrolase 2                                   | NtrY | - | GACGAAA<br>ACTGGCG | 431605  | 431618  | C | -5        |
| A1B781 | Pden_3297 | Heavy metal translocating P-type ATPase            | NtrY | - | Not detected       | -       | -       | - | -         |
| A1B7S2 | Pden_3496 | 3-carboxy- <i>cis,cis</i> -muconate cycloisomerase | NtrY | - | Not detected       | -       | -       | - | -         |
| A1B7S6 | Pden_3500 | Transcriptional regulator, LysR family             | NtrY | - | GATTGGCT<br>GCAACG | 646914  | 646927  | C | -71       |
| A1B7T9 | Pden_3513 | Transcriptional regulator, LysR family             | NtrY | - | Not detected       | -       | -       | - | -         |
| A1B867 | Pden_3644 | Uncharacterized protein                            | NtrY | - | Not detected       | -       | -       | - | -         |
| A1B8A3 | Pden_3680 | GCN5-related <i>N</i> -acetyltransferase           | NtrY | - | CTCCCTCC<br>CCGCGC | 828518  | 828531  | D | -8        |
| A1B8C2 | Pden_3699 | 5-aminolevulinate synthase Heme A                  | NtrY | - | GATTTCCG<br>GGTGCG | 847722  | 847735  | C | -9        |
| A1B8M9 | Pden_3807 | Lytic transglycosylase, catalytic                  | NtrY | - | GAAATCCT<br>CTTGCG | 943434  | 943447  | C | -66       |
|        |           |                                                    |      |   | CTTGCGGC<br>GCCGCG | 943442  | 943455  | D | -58       |
|        |           |                                                    |      |   | GTCTTTGG<br>TTCCCG | 943300  | 943313  | C | -200      |
| A1B8U2 | Pden_3870 | Cyclase/dehydrase                                  | NtrY | - | CTGGATGC<br>GGCGGC | 1005041 | 1005054 | D | Pden_3871 |
| A1B8Z3 | Pden_3921 | Serine-glyoxylate aminotransferase apoenzyme       | NtrY | - | CTTGTTGA<br>CCAAGC | 1057157 | 1057170 | D | -16       |
|        |           |                                                    |      |   | CTGTCCAT<br>TGATGC | 1057180 | 1057193 | D | -39       |
|        |           |                                                    |      |   | CTCTTTTC<br>CAAAGC | 1057261 | 1057274 | D | -120      |
|        |           |                                                    |      |   | GTGGAATC<br>AGATCG | 1057244 | 1057257 | C | -103      |
|        |           |                                                    |      |   | GACCTAAA<br>GTGTGC | 1057231 | 1057244 | C | -90       |
| A1B941 | Pden_3969 | Uncharacterized protein                            | NtrY | - | Not detected       | -       | -       | - | -         |
| A1B9L3 | Pden_4143 | tRNA-specific adenosine deaminase                  | NtrY | - | CTGCGCAT<br>CTCTGC | 1299496 | 1299509 | D | -85       |

|         |           |                                                                      |      |   |                            |         |         |   |           |
|---------|-----------|----------------------------------------------------------------------|------|---|----------------------------|---------|---------|---|-----------|
|         |           |                                                                      |      |   | <b>CTTGCGCG<br/>CAAGGC</b> | 1299560 | 1299573 | D | -21       |
| A1B9Q3  | Pden_4183 | 7-carboxy-7-deazaguanine synthase                                    | NtrY | - | <b>GTAGGCTG<br/>CGACCG</b> | 1341422 | 1341435 | C | Pden_4185 |
| A1BAJ5  | Pden_4475 | Uncharacterized protein                                              | NtrY | - | <b>CTCCTCAG<br/>GCTGGC</b> | 1691784 | 1691797 | D | Pden_4477 |
| A1BAU9  | Pden_4580 | NADPH-dependent FMN reductase                                        | NtrY | - | <b>GAGATTCA<br/>TATCCG</b> | 63178   | 63191   | C | -69       |
|         |           |                                                                      |      |   | <b>CACTGGTA<br/>AGCGGC</b> | 63198   | 63211   | D | -50       |
| A1BB66  | Pden_4699 | Cytochrome B561                                                      | NtrY | - | <b>GTGTTGGG<br/>CTTGCG</b> | 194500  | 194513  | C | Pden_4700 |
| A1BBB9  | Pden_4752 | Aldehyde dehydrogenase                                               | NtrY | - | <b>GATGCGGC<br/>GGGACG</b> | 243082  | 243095  | C | Pden_4754 |
| A1BBF3  | Pden_4786 | Phosphonate ABC transporter, periplasmic phosphonate-binding protein | NtrY | - | Not detected               | -       | -       | - | -         |
| A1BBI8  | Pden_4821 | Uncharacterized protein                                              | NtrY | - | <b>GTGGATCG<br/>ATGGCG</b> | 312182  | 312195  | C | Pden_4816 |
| A1BBM5  | Pden_4859 | 4-hydroxyproline 2-epimerase                                         | NtrY | - | Not detected               | -       | -       | - | -         |
| A1BBP0  | Pden_4874 | Polyamine-transporting ATPase                                        | NtrY | - | Not detected               | -       | -       | - | -         |
| A1BBX3  | Pden_4957 | Transcriptional regulator, AsnC family                               | NtrY | - | <b>CACAGATT<br/>ACCGGC</b> | 463992  | 464005  | D | -206      |
|         |           |                                                                      |      |   | <b>CAAGATAT<br/>ATTCGC</b> | 464088  | 464101  | D | -110      |
|         |           |                                                                      |      |   | <b>CTGCTAGT<br/>CTGCGC</b> | 464151  | 464164  | D | -47       |
|         |           |                                                                      |      |   | <b>GATGAATT<br/>CTGCCG</b> | 464013  | 464026  | C | -185      |
|         |           |                                                                      |      |   | <b>GACTCGGA<br/>GTCCCG</b> | 464168  | 464181  | C | -30       |
|         |           |                                                                      |      |   | <b>GAGTCCCG<br/>GTCGCG</b> | 464174  | 464187  | C | -24       |
| A1BC07  | Pden_4991 | Alcohol dehydrogenase GroES domain protein                           | NtrY | - | Not detected               | -       | -       | - | -         |
| A1BC62  | Pden_5046 | Transcriptional regulator, MarR family                               | NtrY | - | <b>CAAAAGAC<br/>ATATGC</b> | 559309  | 559322  | D | -101      |
|         |           |                                                                      |      |   | <b>CAGAACAA<br/>CCAGGC</b> | 559368  | 559381  | D | -161      |
|         |           |                                                                      |      |   | <b>GTGCGGGT<br/>ATTGCG</b> | 559259  | 559272  | C | -52       |
|         |           |                                                                      |      |   | <b>GTCGGATA<br/>CTGTCC</b> | 559335  | 559348  | C | -128      |
|         |           |                                                                      |      |   | <b>GTCGAGCG<br/>CCTGCG</b> | 559345  | 559358  | C | -138      |
|         |           |                                                                      |      |   | <b>GAATGATC<br/>CGCCCG</b> | 559224  | 559237  | C | -17       |
|         |           |                                                                      |      |   | <b>GACTGCCA<br/>GAGTCG</b> | 559325  | 559338  | C | -118      |
|         |           |                                                                      |      |   | <b>GATACTGT<br/>CGAGCG</b> | 559339  | 559352  | C | -132      |
|         |           |                                                                      |      |   | <b>GAGCGCCT<br/>GCGGCG</b> | 559348  | 559361  | C | -141      |
| A1B2P3* | Pden_1690 | Transcriptional regulator, BadM/Rrf2family (RirA)                    | NtrY | - | <b>CAAGGTTG<br/>CGCGGC</b> | 1672611 | 1672624 | D | -98       |
|         |           |                                                                      |      |   | <b>CTGCAAGG<br/>TTGCGC</b> | 1672608 | 1672621 | D | -101      |

(\*) Detected only in two or one biological samples or displayed a high *p*-value. <sup>1</sup>Protein annotated from UniProt (UP000000361). <sup>2</sup>Genes annotated from GeneBank (T00440). <sup>3</sup>Fold change calculated as the ratio of protein expression in the wild-type/NtrY strain. <sup>4</sup>Orientation of the NtrX binding sequence (C: complementary strand, D:

direct strand), <sup>5</sup> Position (from the start codon) of the of predicted NtrX binding boxes in the promoter regions of genes encoding affected proteins in this study. In several promoter regions NtrX binding boxes could not be detected, but they were found in the promoter regions of adjacent genes.

**Table S2.** *Paracoccus denitrificans* PD1222 iron-responsive regulator homologs in  $\alpha$ -proteobacteria.

| Bacterial strains*                                                   | Irr                                                | MUR                                                | FUR                                                | RtrA                                                                                                                                                                   | IscR |
|----------------------------------------------------------------------|----------------------------------------------------|----------------------------------------------------|----------------------------------------------------|------------------------------------------------------------------------------------------------------------------------------------------------------------------------|------|
| <i>Rhizobium leguminosarum</i> bv. viciae                            | A1B1H1/<br>Pden_1260<br>Id.: 42.0 %<br>Cov.: 71 %  |                                                    |                                                    |                                                                                                                                                                        |      |
| <i>Rhizobium etli</i> CFN 42                                         | A1B1H1/<br>Pden_1260<br>Id.: 42.86 %<br>Cov.: 65 % |                                                    |                                                    |                                                                                                                                                                        |      |
| <i>Rhizobium tropici</i> CIAT 899                                    |                                                    | A1B1H1/<br>Pden_1260<br>Id.: 38.35 %<br>Cov.: 93 % |                                                    |                                                                                                                                                                        |      |
| <i>Bradyrhizobiaceae</i> bacterium SG-6C                             |                                                    | A1B1H1/<br>Pden_1260<br>Id.: 45.19 %<br>Cov.: 83 % |                                                    |                                                                                                                                                                        |      |
| <i>Rhizobium leguminosarum</i> bv. viciae 3841                       |                                                    | A1B1H1/<br>Pden_1260<br>Id.: 42.64 %<br>Cov.: 90 % |                                                    |                                                                                                                                                                        |      |
| <i>Bradyrhizobium japonicum</i><br>("Bradyrhizobium diazoefficiens") |                                                    |                                                    | A1B1H1/<br>Pden_1260<br>Id.: 43.94 %<br>Cov.: 87 % |                                                                                                                                                                        |      |
| <i>Zymomonas mobilis</i>                                             |                                                    |                                                    | A1B1H1/<br>Pden_1260<br>Id.: 49.15 %<br>Cov.: 82 % |                                                                                                                                                                        |      |
| <i>Rhizobium etli</i>                                                |                                                    |                                                    |                                                    | A1B2P3/<br>Pden_1690<br>Id.: 40.94 %<br>Cov.: 93 %<br><br>A1B6G3/<br>Pden_3024<br>Id.: 40.00 %<br>Cov.: 81 %<br><br>A1B9P2/<br>Pden_4172<br>Id.: 40.60 %<br>Cov.: 82 % |      |
| <i>Sinorhizobium meliloti</i> SM11                                   |                                                    |                                                    |                                                    | A1B2P3/<br>Pden_1690<br>Id.: 41.18 %<br>Cov.: 99 %<br><br>A1B9P2/<br>Pden_4172<br>Id.: 42.75 %<br>Cov.: 85 %<br><br>A1B6G3/<br>Pden_3024<br>Id.: 41.86 %<br>Cov.: 83 % |      |
| <i>Agrobacterium tumefaciens</i><br>("Rhizobium radiobacter")        |                                                    |                                                    |                                                    | A1B9P2/<br>Pden_4172<br>Id.: 38.17 %<br>Cov.: 83 %<br><br>A1B6G3/<br>Pden_3024                                                                                         |      |

|                                                               |  |  |  |                                                    |                                                    |
|---------------------------------------------------------------|--|--|--|----------------------------------------------------|----------------------------------------------------|
|                                                               |  |  |  | Id.: 37.21 %<br>Cov.: 82 %                         |                                                    |
| <i>Brucella melitensis</i>                                    |  |  |  | A1B2P3/<br>Pden_1690<br>Id.: 41.84 %<br>Cov.: 92 % |                                                    |
| <i>Rhodospirillum rubrum</i> ATCC 11170                       |  |  |  |                                                    | A1B698/<br>Pden_2958<br>Id.: 42.48 %<br>Cov.: 99 % |
| <i>Caulobacter vibrioides</i> CB15                            |  |  |  |                                                    | A1B698/<br>Pden_2958<br>Id.: 46.90 %<br>Cov.: 91 % |
| <i>Zymomonas mobilis</i> subsp. mobilis ZM4<br>(= ATCC 31821) |  |  |  |                                                    | A1B698/<br>Pden_2958<br>Id.: 36.67 %<br>Cov.: 65 % |

(\*) Bacterial strains were selected according to a previous study [22]. The protein sequenced were aligned with the Blastp from NCBI (<https://blast.ncbi.nlm.nih.gov/Blast.cgi>), yielding the identity (Id.) and coverage (Cov.).

**Table S3.** Oligonucleotides used in the qRT-PCR analysis of *P. denitrificans* PD1222.

| Primer name* | Name                                                                  | Sequence (5'-3')      |
|--------------|-----------------------------------------------------------------------|-----------------------|
| Pden_0893F   | Cytochrome <i>c</i> peroxidase (Ccp)                                  | GTCAGCTTCGACAACTTCGC  |
| Pden_0893R   |                                                                       | TGCAGCCGGTCTCGATAAAG  |
| Pden_1260F   | Manganese uptake regulator, Fur family (Mur/Irr)                      | CTGGCGACGGTTTATCGCAC  |
| Pden_1260R   |                                                                       | GCCGGTCTCGACATCGATCA  |
| Pden_1355F   | Methionine synthase (B <sub>12</sub> -independent)                    | CAATGCCATCGAAACACCCG  |
| Pden_1355R   |                                                                       | CCCGCCAGAATTTTCGTTTCG |
| Pden_1690F   | Transcriptional regulator, BadM/Rrf2family (RirA)                     | CTTGTGCGCCATACCGAGGA  |
| Pden_1690R   |                                                                       | CAGGCTGTAGCCGTCCAGAA  |
| Pden_1848F   | Cytochrome <i>c</i> oxidase, <i>cbb</i> <sub>3</sub> -type, subunit I | CCATGCTGCATATCGTCAAC  |
| Pden_1848R   |                                                                       | CATACCACCATTCGCGTCATC |
| Pden_1850F   | Putative transcriptional regulator, Crp/Fnr family (FnrP)             | CTTGTGCTGTGCTGCTTTCG  |
| Pden_1850R   |                                                                       | CAAGCTCGTCCAGCGTCATC  |
| Pden_1937F   | Cytochrome <i>c</i> <sub>550</sub>                                    | CGAGGCCGACCTGATCGAAT  |
| Pden_1937R   |                                                                       | GCCCTTGTCGTCGGTCATCT  |
| Pden_2046F   | TonB-dependent receptor                                               | CCAGATCACCGCCGAGGATT  |
| Pden_2046R   |                                                                       | GCGAGAAGCTGAGCTCGGTA  |
| Pden_2305F   | Ubiquinol-cytochrome <i>c</i> reductase iron-sulfur subunit           | AAAACCGCACGATGGACGAG  |
| Pden_2305R   |                                                                       | AATTCGGCGACGGGGATATG  |
| Pden_2484F   | Nitric oxide reductase subunit C (NorC)                               | ACCAAGAACATGGCCCGGAA  |
| Pden_2484R   |                                                                       | CCTTGGTGCGGGCGTAGATA  |
| Pden_2486F   | Protein (NirI)                                                        | TCTATTGCCGCTACCTGTGC  |
| Pden_2486R   |                                                                       | GACAGTGCATTTTCGTCTCGC |
| Pden_2487F   | Nitrite reductase (NirS)                                              | TCCGACGCCCAATACAACGA  |
| Pden_2487R   |                                                                       | TGCAGGTAGTCGAAGCCCAG  |
| Pden_2610F   | TonB-dependent receptor                                               | ATGGCCAGGAGAACGTCGAG  |
| Pden_2610R   |                                                                       | CCGGAACGGTGATGGAGGA   |
| Pden_2832F   | Rieske (2Fe-2S) domain protein                                        | TCTGGTATCGCGAATGGCTC  |
| Pden_2832R   |                                                                       | ATCACCACCGGATATTCGCC  |
| Pden_2958F   | Transcriptional regulator, BadM/Rrf2 family (IscR)                    | ACATCTCGCTGCCCTATCTG  |
| Pden_2958R   |                                                                       | GATATGCAATGCGCTGACGG  |
| Pden_3027F   | Alkyl hydroperoxide reductase (AhpD)                                  | AACGAGCAGATCATGGAGGC  |

|            |                                                                                    |                            |
|------------|------------------------------------------------------------------------------------|----------------------------|
| Pden_3027R |                                                                                    | TCTCATCCAGAACCGCAAGC       |
| Pden_4044F | NnrS family protein                                                                | TCTGCCTTATTACGCCTCG        |
| Pden_4044R |                                                                                    | GCATGGCGGAAATCCCAAAG       |
| Pden_4127F | Two component, $\sigma^{54}$ specific, transcriptional regulator Fis family (NtrX) | TCTATTTGACGAGGTGGCG        |
| Pden_4127R |                                                                                    | TTCAGCCGGTCGTAGAGTTC       |
| Pden_4128F | PAS/PAC sensor signal transduction histidine kinase (NtrY)                         | CGGTGAATATCGGGCTGGAGGGCTGG |
| Pden_4128R |                                                                                    | TGGCGTCGTTGGTCAAGTCTCGGCG  |
| Pden_4139F | Putative ferric uptake regulator, Fur family                                       | CTTCGGAATCCCCGCCTGAC       |
| Pden_4139R |                                                                                    | CCTTCGGTCCTTGCCTGCTC       |
| Pden_4213F | Acetyl-coenzyme A synthetase (AcCoA synthetase)                                    | AAGCCCCGACCTGATCCAATG      |
| Pden_4213R |                                                                                    | TCGATGAGTTGGTCCACGAC       |
| Pden_4220F | FMN-binding domain protein (NosR)                                                  | TGTCGGTCGTGAACCTGATG       |
| Pden_4220R |                                                                                    | ACCTGGTTGGTCAGCTCTTG       |
| Pden_4221F | Uncharacterized protein (NosC)                                                     | CCTTGCAGGAGGTCGCCATT       |
| Pden_4221R |                                                                                    | GGGTGTTTCATTGCCTTCGGC      |
| Pden_4222F | Pseudoazurin                                                                       | TGACCGAGCCCGGACTTTAC       |
| Pden_4222R |                                                                                    | GCCTTCTTGGGCATCTTCGC       |
| Pden_4230F | NnrS family protein                                                                | CTGCTGGCATTGGGTTTCTG       |
| Pden_4230R |                                                                                    | CCGATGAGCGCCAGATATAG       |
| Pden_4237F | Nitrate/nitrite transporter (NarK)                                                 | TCGTCTGGGTGCCCTTCATC       |
| Pden_4237R |                                                                                    | AGCAGGCACATCACCCAGTT       |
| Pden_4453F | Major facilitator superfamily MFS_1 (NasA)                                         | CAGATCCGCGAGCAGCTTTC       |
| Pden_4453R |                                                                                    | ATCGTATAGACCAGCCGCCC       |
| Pden_4455F | Response regulator receiver and ANTAR domain protein (NasT)                        | TCGTCATCGAATCCGACCCG       |
| Pden_4455R |                                                                                    | GAGGCCGGTTTCTTCCGAGA       |
| Pden_4719F | Periplasmic nitrate reductase subunit (NapE)                                       | ATCGTCCCAAGCACCAGAAG       |
| Pden_4719R |                                                                                    | AGACGATGAATCCGTAGCCG       |
| Pden_5107F | Cytochrome ba3 quinol oxidase subunit 1                                            | CGTGTTTTCCGAAGTCACCT       |
| Pden_5107R |                                                                                    | GCCCATGGTGAAGAAGTGAT       |

(\*) F: forward, R: reverse.

## Supplementary Figure legends

**Figure S1.** *P. denitrificans* gene clusters with NtrX targets genes. **(A)** Pden\_4124, RNA-binding protein Hfq; Pden\_4125, cation transporter; Pden\_4126, TrkA-N domain protein; Pden\_4127, two-component system, sigma54 specific, transcriptional regulator NtrX; Pden\_4128, PAS/PAC sensor signal transduction histidine kinase NtrY; Pden\_4129, two component, sigma54 specific, transcriptional regulator NtrC; Pden\_4130, signal transduction histidine kinase, nitrogen specific NtrB; Pden\_4131, tRNA-U20-dihydrouridine synthase; Pden\_4132, L-serine ammonia-lyase. **(B)** Pden\_4230, NnrS family protein; Pden\_4231, conserved hypothetical protein; Pden\_4232, PpiC-type peptidyl-prolyl cis-trans isomerase; Pden\_4233, respiratory nitrate reductase gamma subunit NarI; Pden\_4234, respiratory nitrate reductase chaperone NarJ; Pden\_4235, respiratory nitrate reductase beta subunit NarH; Pden\_4236, respiratory nitrate reductase alpha subunit apoprotein NarG; Pden\_4237, nitrate/nitrite transporter NarK; Pden\_4238, putative transcriptional regulator, Crp/Fnr family NarR; Pden\_4239, DNA-O6-methylguanine--protein-cysteine S-methyltransferase; Pden\_4240, FAD-binding 9, siderophore-interacting domain protein; Pden\_4241, drug resistance transporter, Bcr/CflA subfamily; Pden\_4242, conserved hypothetical protein. Pden\_2478, putative transcriptional regulator, Crp/Fnr family NNR; Pden\_2479, hypothetical protein NorF; Pden\_2480, nitric oxide reductase NorE protein; Pden\_2481, nitric oxide reductase NorD protein; Pden\_2482, nitric oxide reductase NorQ protein; Pden\_2483, nitric oxide reductase, NorB subunit apoprotein; Pden\_2484, nitric oxide reductase, NorC subunit apoprotein; Pden\_2485, FAD:protein FMN transferase; Pden\_2486, NosR/NirI family transcriptional regulator, nitrite reductase regulator; Pden\_2487, nitrite reductase NirS; Pden\_2488, uroporphyrinogen-III C-methyltransferase; Pden\_2489, cytochrome c55X.



Pden\_4213, acetyl-coenzyme A synthetase; Pden\_4214, FAD:protein FMN transferase NosX; Pden\_4215, NosL family protein; Pden\_4216, nitrous oxide maturation protein NosY; Pden\_4217, ABC transporter related protein NosF; Pden\_4218, periplasmic copper-binding protein NosD; Pden\_4219, nitrous oxide reductase apoprotein NosZ; Pden\_4220, NosR/NirI family transcriptional regulator, nitrous oxide reductase regulator; Pden\_4221, hypothetical protein; Pden\_4222, pseudoazurin; Pden\_4223, conserved hypothetical protein. (C) Pden\_4456, MOSC domain containing protein; Pden\_4455, response regulator receiver and ANTAR domain protein NasT; Pden\_4454, two-component system, oxyanion-binding sensor NasS; Pden\_4453, MFS transporter, NNP family, nitrate/nitrite transporter NasA; Pden\_4452, assimilatory nitrite reductase (NAD(P)H) large subunit precursor NasB; Pden\_4451, assimilatory nitrite reductase (NAD(P)H) small subunit NasG; Pden\_4450, formate/nitrite transporter NasH; Pden\_4449, assimilatory nitrate reductase (NADH) alpha subunit apoprotein NasC; Pden\_4448, iron(III) transport system ATP-binding protein; Pden\_4447, iron(III) transport system substrate-binding protein. Pden\_4717, TRAP dicarboxylate transporter, DctM subunit; Pden\_4718, hypothetical protein; Pden\_4719, periplasmic nitrate reductase subunit NapE; Pden\_4720, periplasmic nitrate reductase chaperone NapD; Pden\_4721, periplasmic nitrate reductase subunit NapA apoprotein; Pden\_4722, periplasmic nitrate reductase subunit NapB; Pden\_4723, periplasmic nitrate reductase subunit NapC.

**Figure S2.** PCA analysis of the quantitative proteomic data. PCA analysis of *P. denitrificans* PD1222 wild-type strain and NtrY mutant proteomes under denitrifying conditions. The analysis was carried out in Perseus (version 1.6.2.3). Only LFQ intensity values of differentially expressed proteins with respect to the reference proteome (wild-type strain) were used. Missing values were imputed with the value of the mean of the

five lowest LFQ normalized intensity values of the whole experiment. Resulting data were normalized by Z-score using the mean without grouping.

**Figure S3.** Hierarchical clustering of *P. denitrificans* PD1222 proteomes obtained by LC-MS/MS analyses of the wild-type strain and NtrY mutant. Clustering approach was carried out in Perseus (version 1.6.2.3). Values previously assigned were used for a hierarchical cluster by using Euclidean distance. Eleven clusters representing different expression profiles were defined by using a distance threshold of 3.43253755569458.

**Figure S4.** Volcano plot of the proteomic data. PCA analysis of *P. denitrificans* PD1222 wild-type strain and NtrY mutant proteomes under denitrifying conditions.

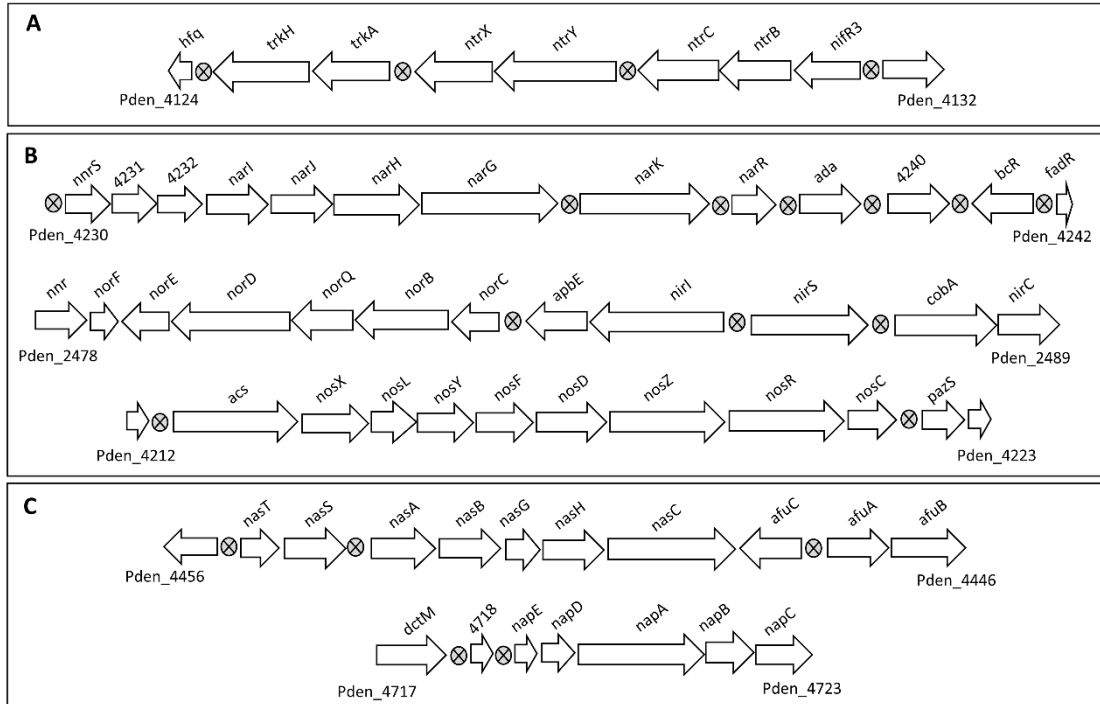

Figure S1

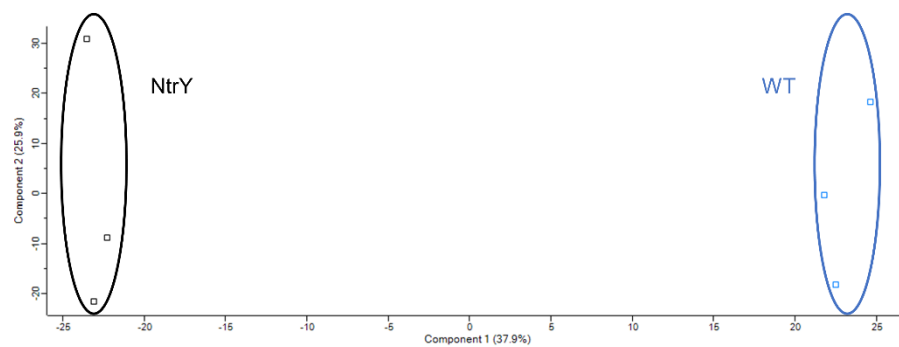

Figure S2

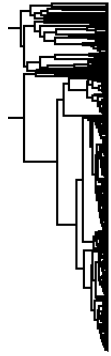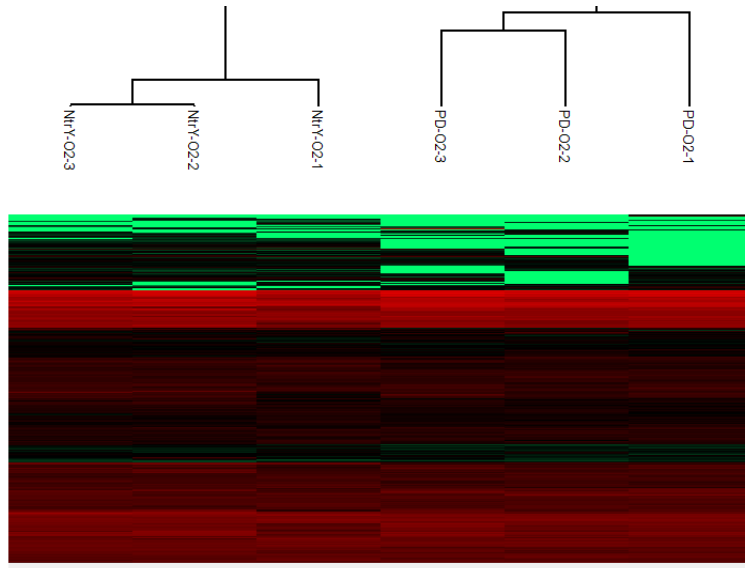

Figure S3

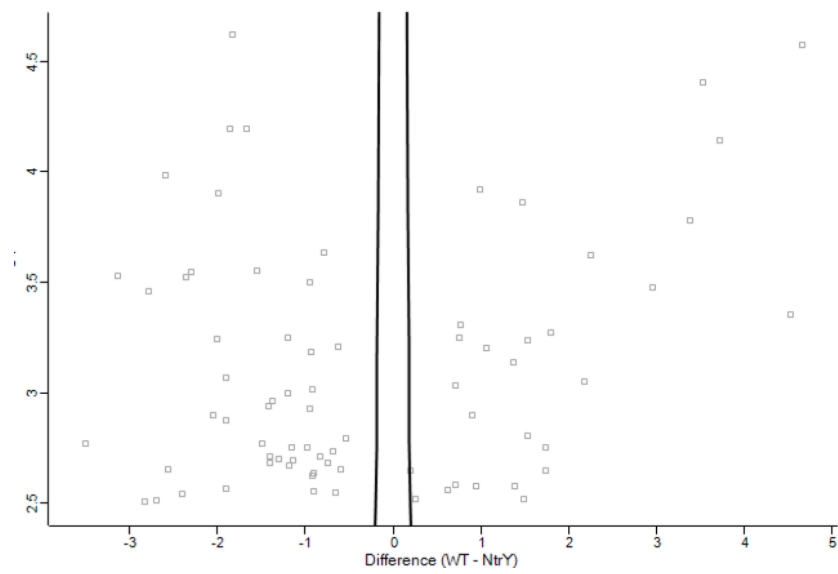

Figure S4
